# Supplementary material for: Reimagining Primary Health Care: A Historical and Contemporary Review of Community-Based Care Models and Innovations
Source: Research Square preprint supplement (doi:10.21203/rs.3.rs-7613144/v1), 2025-10-12
Supplement: Supplementary file 1 [file c33c0f07e39f53e5a3d0677e.docx]

**SUPPLEMENTARY MATERIAL**

**eSupplementary Table 1.** Search Strategy

**eSupplementary Table 2.** Summary of literatures included in this review

**eSupplementary Table 1. Search Strategy**

| **Databases** | **Search Strategy** |
| --- | --- |
| **Pubmed (via NLM)** | ("Community Health Services"[MeSH] OR "community-based care"[tiab] OR "community health services"[tiab]  OR "community-oriented primary care"[tiab] OR "community health worker"[tiab] OR CHW [tiab]  OR "volunteer health worker"[tiab] OR "digital health"[tiab] OR telemedicine[MeSH] OR telemedicine[tiab]  OR "mobile health"[tiab] OR mHealth[tiab] OR "artificial intelligence"[MeSH] OR "artificial intelligence"[tiab]  OR "AI in health care"[tiab] OR "machine learning"[MeSH] OR "machine learning"[tiab]  OR "health system integration"[tiab] OR "diagonal integration"[tiab] OR "horizontal integration"[tiab]  OR syndemic[tiab] OR syndemics[tiab] OR "pandemic preparedness"[tiab] OR "COVID-19"[MeSH] OR COVID-19[tiab]  OR "primary health care"[MeSH] OR "primary health care"[tiab]  OR "universal health coverage"[MeSH] OR "universal health coverage"[tiab]  OR "low- and middle-income countries"[tiab] OR LMIC[tiab] OR LMICs[tiab]) |
| **Web of Science** | TS=("community-based care" OR "community health services" OR "community-oriented primary care"  OR "community health worker" OR CHW OR "volunteer health worker"  OR "digital health" OR telemedicine OR "mobile health" OR mHealth  OR "artificial intelligence" OR "AI in health care" OR "machine learning"  OR "health system integration" OR "diagonal integration" OR "horizontal integration"  OR syndemic OR syndemics OR "pandemic preparedness" OR "COVID-19"  OR "primary health care" OR "universal health coverage"  OR "low- and middle-income countries" OR LMIC OR LMICs) |
| **Google Scholar** | "community-based care" OR "community health services" OR "community-oriented primary care"  OR "community health worker" OR CHW OR "volunteer health worker"  OR "digital health" OR telemedicine OR "mobile health" OR mHealth  OR "artificial intelligence" OR "AI in health care" OR "machine learning"  OR "health system integration" OR "diagonal integration" OR "horizontal integration"  OR syndemic OR syndemics OR "pandemic preparedness" OR "COVID-19"  OR "primary health care" OR "universal health coverage"  OR "low- and middle-income countries" OR LMIC OR LMICs |

**eSupplementary Table 2.** Summary of literatures included in this review

| **SN** | **DOCUMENT** | **COUNTRY** | **METHODS** | **RESULTS** | **LIMITATIONS** |
| --- | --- | --- | --- | --- | --- |
| 1 | Sieverding M, Beyeler N. Integrating informal providers into a people-centered health systems approach: qualitative evidence from local health systems in rural Nigeria. BMC Health Services Research 2016; 16(1): 526. | Nigeria | Qualitative interviews/ focus groups/ thematic analysis | Provides qualitative insights into implementation, acceptability and system-level enablers and barriers. | Context-specific findings from purposive samples; Not widely applicable |
| 2 | Anand TN, Joseph LM, Geetha AV, Prabhakaran D, Jeemon P. Task sharing with non-physician health-care workers for management of blood pressure in low-income and middle-income countries: a systematic review and meta-analysis. Lancet Glob Health 2019; 7(6): e761-e71. | Global/ Multiple regions | Systematic/ scoping review or meta-analysis | Synthesizes evidence showing community or digital interventions impact access/quality; key enablers and barriers identified. | Study variability and risk of publication bias |
| 3 | Bhattarai HK, Khanal P, Khanal V, et al. Factors associated with child health service delivery by female community health volunteers in Nepal: findings from a national survey. BMC Health Services Research 2020; 20(1): 561. | Nepal | Cross-sectional survey/ secondary data analysis | outlines community, health system or digital health approaches with implications for policy/practice. | Causality cannot be inferred due to study design; risk of publication bias |
| 4 | Gilmore B, Dsane-Aidoo PH, Rosato M, Yaqub NO, Doe R, Baral S. Institutionalising community engagement for quality of care: moving beyond the rhetoric. BMJ 2023; 381: e072638. | Not specified/ general | Narrative review/ program description | Summarizes community, health system or digital health approaches with relevant outcomes for policy/practice. | Findings may not be generalized due to data and context limitations |
| 5 | Nelson A. Body and soul: The Black Panther Party and the fight against medical discrimination: U of Minnesota Press; 2011. | Not specified/ general | Narrative review/ program description | Historical or program narrative illustrating foundational community health models and their legacy. | Findings may be affected by data limitations and setting-specific factors |
| 6 | Leslie T, Rowland M, Mikhail A, et al. Use of malaria rapid diagnostic tests by community health workers in Afghanistan: cluster randomised trial. BMC medicine 2017; 15: 1-11. | Afghanistan | Randomized/ cluster randomized trial | Evaluates an intervention showing improved programmatic or clinical outcomes with contextual caveats. | External validity and consistent implementation may not be ascertained |
| 7 | Fenta MD, Ogundijo OA, Warsame AAA, Belay AG. Facilitators and barriers to tuberculosis active case findings in low-and middle-income countries: a systematic review of qualitative research. BMC Infectious Diseases 2023; 23(1): 515. | Global/ Multiple regions | Systematic/ scoping review or meta-analysis, Qualitative interviews/ focus groups discussion/ thematic analysis | Recapitulates evidence showing community or digital interventions impact access/quality; key enablers and barriers identified. | Limited by heterogeneity of included studies and potential publication bias. |
| 8 | Gizaw Z, Astale T, Kassie GM. What improves access to primary healthcare services in rural communities? A systematic review. BMC Prim Care 2022; 23(1): 313. | Global/ Multiple regions | Systematic/ scoping review or meta-analysis | Reviews evidence showing community or digital interventions impact on access/quality; key enablers and barriers are identified. | Inconsistent study designs and possible reporting bias |
| 9 | Karuga R, Dieleman M, Mbindyo P, et al. Community participation in the health system: analyzing the implementation of community health committee policies in Kenya. Primary Health Care Research & Development 2023; 24: e33. | Kenya | Narrative review/ program description | Abstracts community, health system or digital health approaches with its impacts on policies/ practices. | Findings limited by data availability and contextual factors |
| 10 | Singh S, Miller E, Closser S. Nurturing transformative local structures of multisectoral collaboration for primary health care: qualitative insights from select states in India. BMC Health Services Research 2024; 24(1): 634. | India | Qualitative interviews/ focus groups/ thematic analysis | Provides qualitative insights into implementation, acceptability and system-level enablers and barriers. | Context-specific findings from purposive samples; limited external validity |
| 11 | Kapuya HA, Maluka SO, Hurtig A-K, Sebastian MS. Assessing community awareness and participation in health facility governing committees in two districts of Tanzania: a cross-sectional study. Archives of Public Health 2024; 82(1): 194. | Tanzania | Cross-sectional survey/ secondary data analysis | Recaps community, health system or digital health approaches with ramification on policies/ practices. | Cross-sectional design limits causal inference; risk of reporting bias. |
| 12 | Godlee F, Pakenham-Walsh N, Ncayiyana D, Cohen B, Packer A. Can we achieve health information for all by 2015? The Lancet 2004; 364(9430): 295-300. | Not specified/ general | Narrative review/ program description | Gives an overview of community, health system or digital health approaches with its bearings on governance/ practice. | Findings Limited by data availability and contextual factors. |
| 13 | Kerasidou A. Artificial intelligence and the ongoing need for empathy, compassion and trust in healthcare. Bulletin of the World Health Organization 2020; 98(4): 245. | Not specified/ general | Narrative review/ program description | Presents on summary on community, health system or digital health approaches with implications for policy/ practice. | Findings may be limited by data availability and context-specific factors. |
| 14 | Organization WH. The World Health Report 2010, Health Systems Financing: the Path to Universal Coverage; https://www.who.int/publications/i/item/9789241564021; assessed 6/2/2025 2012. | Global/ Multiple regions | Historical/ policy/ case study | Policy-oriented synthesis or perspective outlining priorities and frameworks for strengthening PHC or digital health. | Not primary empirical research; limited quantitative effect estimates. |
| 15 | Aantjes C, Quinlan T, Bunders J. Integration of community home based care programmes within national primary health care revitalisation strategies in Ethiopia, Malawi, South-Africa and Zambia: a comparative assessment. Globalization and Health 2014; 10(1): 85. | Ethiopia | Narrative review/ program description | Synthesizes community, health system or digital health approaches with implications for policy/ implementation. | Findings may be limited by data availability and context-specific factors. |
| 16 | Shahmanesh M, Okesola N, Chimbindi N, et al. Thetha Nami: participatory development of a peer-navigator intervention to deliver biosocial HIV prevention for adolescents and youth in rural South Africa. BMC Public Health 2021; 21(1): 1393. | South Africa | Narrative review/ program description | Condenses community, health system or digital health approaches with its use for policy/practice. | Findings may be limited by data availability and context-specific factors. |
| 17 | Olaniran A, Smith H, Unkels R, Bar-Zeev S, van den Broek N. Who is a community health worker? - a systematic review of definitions. Glob Health Action 2017; 10(1): 1272223. | Global/ Multiple regions | Systematic/ scoping review or meta-analysis | Outlines evidence showing community or digital interventions impact access/ quality; key enablers and barriers identified. | Limited by heterogeneity of included studies and potential of publication bias. |
| 18 | Gunderson JM, Wieland ML, Quirindongo-Cedeno O, et al. Community Health Workers as an Extension of Care Coordination in Primary Care: A Community-Based Cosupervisory Model. J Ambul Care Manage 2018; 41(4): 333-40. | Not specified/ general | Narrative review/ program description | Summarizes community, health system or digital health approaches with implications for policy/ practice. | Findings may be limited by data availability and context-specific factors. |
| 19 | Woldie M, Feyissa GT, Admasu B, et al. Community health volunteers could help improve access to and use of essential health services by communities in LMICs: an umbrella review. Health Policy Plan 2018; 33(10): 1128-43. | Multiple LMICs | Systematic/ scoping review or meta-analysis | Reviews evidence showing community or digital interventions impact access/quality; key enablers and barriers identified. | Not primary empirical research; limited quantitative effect estimates. |
| 20 | Joag K, Shields-Zeeman L, Kapadia-Kundu N, Kawade R, Balaji M, Pathare S. Feasibility and acceptability of a novel community-based mental health intervention delivered by community volunteers in Maharashtra, India: the Atmiyata programme. BMC Psychiatry 2020; 20(1): 48. | India | Narrative review/ program description | Prioritises community, health system or digital health approaches with implications for policies and practices. | Findings limited due to data availability and context-specific factors. |
| 21 | Gaber J, Oliver D, Valaitis R, et al. Experiences of integrating community volunteers as extensions of the primary care team to help support older adults at home: a qualitative study. BMC Fam Pract 2020; 21(1): 92. | Not specified/ general | Qualitative interviews/ focus groups/ thematic analysis | Provides qualitative insights into implementation, acceptability and system-level enablers and barriers. | Context-specific findings from purposive samples; Limited external validity |
| 22 | Shalaby RAH, Agyapong VIO. Peer Support in Mental Health: Literature Review. JMIR Ment Health 2020; 7(6): e15572. | Not specified/ general | Narrative review/ program description | Policy-oriented synthesis or perspective outlining priorities and frameworks for strengthening PHC or digital health. | Findings limited due to data availability and context-specific factors. |
| 23 | Safary E, Mwandeti M, Matanje B, et al. Role of community health volunteers in identifying people with elevated blood pressure for diagnosis and monitoring of hypertension in Malawi: a qualitative study. BMC Cardiovascular Disorders 2021; 21(1): 361. | Malawi | Qualitative interviews/ focus groups/ thematic analysis | Presents qualitative insights into implementation, acceptability and system-level enablers and barriers. | Context-specific findings from purposive samples; Limited external validity |
| 24 | Panday S, Bissell P, van Teijlingen E, Simkhada P. The contribution of female community health volunteers (FCHVs) to maternity care in Nepal: a qualitative study. BMC Health Services Research 2017; 17(1): 623. | Nepal | Qualitative interviews/ focus groups/ thematic analysis | Illustrates qualitative details into implementation, acceptability and system-level enablers and barriers. | Context-specific findings from purposive samples; Limited external validity |
| 25 | Ngilangwa DP, Mgomella GS. Factors associated with retention of community health workers in maternal, newborn and child health programme in Simiyu Region, Tanzania. African Journal of Primary Health Care and Family Medicine 2018; 10(1): 1-8. | Tanzania | Narrative review/ program description | Overview on community, health system or digital health approaches with implications for policy/practice. | Findings limited due to data availability and context-specific factors. |
| 26 | Olang’o CO, Nyamongo IK, Aagaard-Hansen J. Staff attrition among community health workers in home-based care programmes for people living with HIV and AIDS in western Kenya. Health Policy 2010; 97(2-3): 232-7. | Kenya | Historical/ policy/ commentary or case study | Policy-oriented synthesis or perspective outlining priorities and frameworks for strengthening PHC or digital health. | Not primary empirical research; limited quantitative effect estimates. |
| 27 | Willis-Shattuck M, Bidwell P, Thomas S, Wyness L, Blaauw D, Ditlopo P. Motivation and retention of health workers in developing countries: a systematic review. BMC health services research 2008; 8: 1-8. | Global/ Multiple regions | Systematic/ scoping review or meta-analysis | Synthesizes evidence showing community or digital interventions impact access/quality; key enablers and barriers identified. | Study variability and risk of publication bias |
| 28 | Rössler W, Riecher-Rössler A, Meise U. Wilhelm Griesinger and the concept of community care in 19th-century Germany. Psychiatric Services 1994; 45(8): 818-22. | Not specified/ general | Narrative review/ program description | Summarizes community, health system or digital health approaches with implications for policy/practice. | Findings may be limited by data availability and context-specific factors. |
| 29 | DANIŞ MZ. Community based care understanding and social services: A care model proposal from Turkey. Turkish Journal of Geriatrics 2008; 11(2). | Not specified/ general | Narrative review/ program description | Summarizes community, health system or digital health approaches with implications for policy/practice. | Findings may be limited by data availability and context-specific factors. |
| 30 | Longlett SK, Kruse JE, Wesley R. Community-oriented primary care: historical perspective. The Journal of the American Board of Family Practice 2001; 14(1): 54-63. | Americas | Historical/ policy/ commentary or case study | Policy-oriented synthesis or perspective outlining priorities and frameworks for strengthening PHC or digital health. | Not based on primary data, limited quantitative effect estimates |
| 31 | Tollman S. Community oriented primary care: Origins, evolution, applications. Social Science & Medicine 1991; 32(6): 633-42. | Not specified/ general | Narrative review/ program description | Summarizes community, health system or digital health approaches with implications for policy/ practice. | Findings could be limited due data availability and context-specific factors. |
| 32 | Organization WH. Declaration of Alma-Ata International Conference on Primary Health Care, Alma-Ata. Available online at https://www.who.int/docs/default-source/documents/almaata-declaration-en.pdf (assessed on 8th March 2025). 1979. | Global/ Multiple regions | Historical/ policy/ commentary or case study | Policy-oriented synthesis or perspective outlining priorities and frameworks for strengthening PHC or digital health. | Derived from secondary sources; lacks robust effect estimates |
| 33 | Liu Y. The Impact of Early Childhood Access to Community Health Workers: Evidence from China’s Barefoot Doctors. 2021. | China | Narrative review/ program description | Historical or program narrative illustrating foundational community health models and their legacy. | Findings could be limited due data availability and context-specific factors. |
| 34 | Bhattacharya J. WHO and its transformation–A journey from 1978 to 2024. Medknow; 2024. p. 1589-93. | Global/ Multiple regions | Narrative review/ program description | Policy-oriented synthesis or perspective outlining priorities and frameworks for strengthening PHC or digital health. | Findings could be limited due data availability and context-specific factors. |
| 35 | Laurell AC. What does Latin American social medicine do when it governs? The case of the Mexico City government. American Journal of Public Health 2003; 93(12): 2028-31. | Mexico | Narrative review/ program description | Summarizes community, health system or digital health approaches with implications for policy/ practice. | Findings could be limited due data availability and context-specific factors. |
| 36 | Khatri RB, Mishra SR, Khanal V. Female Community Health Volunteers in Community-Based Health Programs of Nepal: Future Perspective. Front Public Health 2017; 5: 181. | Nepal | Historical/ policy/ commentary or case study | Policy-oriented synthesis or perspective outlining priorities and frameworks for strengthening PHC or digital health. | Findings could be limited due data availability and context-specific factors. |
| 37 | Organization WH. What do we know about community health workers? A systematic review of existing reviews; https://www.who.int/publications/i/item/what-do-we-know-about-community-health-workers-a-systematic-review-of-existing-reviews; assessed 6/11/2025, 2021. | Global/ Multiple regions | Systematic/ scoping review or meta-analysis | Synthesizes evidence showing community or digital interventions impact access/ quality; key enablers and barriers identified. | Limited comparability of studies; possible reporting bias |
| 38 | Early J, Gonzalez C, Gordon-Dseagu V, Robles-Calderon L. Use of mobile health (mHealth) technologies and interventions among community health workers globally: a scoping review. Health promotion practice 2019; 20(6): 805-17. | Global | Systematic/ scoping review or meta-analysis | Synthesizes evidence showing community or digital interventions impact access/quality; key enablers and barriers identified. | Findings could be limited due data availability and context-specific factors. |
| 39 | Rodrigues SM, Kanduri A, Nyamathi A, Dutt N, Khargonekar P, Rahmani AM. Digital health–enabled community-centered care: scalable model to empower future community health workers using human-in-the-loop artificial intelligence. JMIR formative research 2022; 6(4): e29535. | Not specified/ general | Narrative review/ program description | Summarizes community, health system or digital health approaches with implications for policy/ practice. | Findings could be limited due data availability and context-specific factors. |
| 40 | Aziato L, Omenyo CN. Initiation of traditional birth attendants and their traditional and spiritual practices during pregnancy and childbirth in Ghana. BMC Pregnancy Childbirth 2018; 18(1): 64. | Ghana | Narrative review/ program description | Summarizes community, health system or digital health approaches with implications for policy/practice. | Findings could be limited due data availability and context-specific factors. |
| 41 | Birhan W, Giday M, Teklehaymanot T. The contribution of traditional healers' clinics to public health care system in Addis Ababa, Ethiopia: a cross-sectional study. Journal of Ethnobiology and Ethnomedicine 2011; 7(1): 39. | Ethiopia | Cross-sectional survey/ secondary data analysis | Summarizes community, health system or digital health approaches with implications for policy/ practice. | Cross-sectional design limits causal inference; potential of reporting bias. |
| 42 | Subedi B. Whose knowledge counts? Indigenous traditional healers and health knowledge in contemporary Nepal. Dhaulagiri Journal of Sociology and Anthropology 2022; 16: 59-69. | Nepal | Narrative review/ program description | Policy-oriented synthesis or perspective outlining priorities and frameworks for strengthening PHC or digital health. | Findings could be limited due data availability and context-specific factors. |
| 43 | Lyngdoh JP. Contribution of Traditional Medicine Toward Primary Health Care in Meghalaya. In: Kaushik A, Suchiang A, eds. Narratives and New Voices from India: Cases of Community Development for Social Change. Singapore: Springer Nature Singapore; 2022: 203-14. | India | Historical/ policy/ commentary or case study | Summarizes community, health system or digital health approaches with implications for policy/ practice. | Findings could be limited due data availability and context-specific factors. |
| 44 | Subedi B. Perspective Chapter: Integrating Traditional Healers into the National Health Care System – A Review and Reflection. In: Rusangwa C, ed. Rural Health - Investment, Research and Implications. Rijeka: IntechOpen; 2023. | United States | Historical/ policy/ commentary or case study | Policy-oriented synthesis or perspective outlining priorities and frameworks for strengthening PHC or digital health. | Findings could be limited due data availability and context-specific factors. |
| 45 | Ijaz N, Boon H. Statutory regulation of traditional medicine practitioners and practices: the need for distinct policy making guidelines. The Journal of Alternative and Complementary Medicine 2018; 24(4): 307-13. | Not specified/ general | Historical/ policy/ commentary or case study | Policy-oriented synthesis or perspective outlining priorities and frameworks for strengthening PHC or digital health. | Not primary empirical research; limited quantitative effect estimates. |
| 46 | Oliver SJ. The role of traditional medicine practice in primary health care within Aboriginal Australia: a review of the literature. Journal of ethnobiology and ethnomedicine 2013; 9: 1-8. | Not specified/ general | Narrative review/ program description | Policy-oriented synthesis or perspective outlining priorities and frameworks for strengthening PHC or digital health. | Findings could be limited due data availability and context-specific factors. |
| 47 | Foley G. Redfern Aboriginal Medical Service 1971-1991: twenty years of community service: Aboriginal Medical Service Co-operative; 1991. | Not specified/ general | Narrative review/ program description | Summarizes community, health system or digital health approaches with implications for policy/ practice. | Findings could be limited due data availability and context-specific factors. |
| 48 | Joardar T, Javadi D, Gergen J, Perry HB. The BRAC Shasthya Shebika and Shasthya Kormi Community Health Workers in Bangladesh. Health for the People: National Community Health Worker Programs from Afghanistan to Zimbabwe 2020; 51. | Afghanistan | Narrative review/ program description | Summarizes community, health system or digital health approaches with implications for policy/ practice. | Findings could be limited due data availability and context-specific factors. |
| 49 | Wen C. Barefoot doctors in China. Nurs Dig 1975; 3(1): 26-8. | China | Narrative review/ program description | Historical or program narrative illustrating foundational community health models and their legacy. | Findings could be limited due data availability and context-specific factors. |
| 50 | Perry HB, Rohde J. The Jamkhed comprehensive rural health project and the Alma-Ata vision of primary health care. American journal of public health 2019; 109(5): 699-704. | Americas | Narrative review/ program description | Historical or program narrative illustrating foundational community health models and their legacy. | Findings could be limited due data availability and context-specific factors. |
| 51 | Healey J, Wiah SO, Horace JM, Majekodunmi DB, Duokie DS. Liberia's community health assistant program: scale, quality, and resilience. Global Health: Science and Practice 2021; 9(Supplement 1): S18-S24. | Liberia | Narrative review/ program description | Summarizes community, health system or digital health approaches with implications for policy/ practice. | Findings could be limited due data availability and context-specific factors. |
| 52 | Hafeez A, Mohamud BK, Shiekh MR, Shah SAI, Jooma R. Lady health workers programme in Pakistan: challenges, achievements and the way forward. JPMA The Journal of the Pakistan Medical Association 2011; 61(3): 210. | Pakistan | Narrative review/ program description | Summarizes community, health system or digital health approaches with implications for policy/ practice. | Findings could be limited due data availability and context-specific factors. |
| 53 | Koblinsky MA, Campbell O, Heichelheim J. Organizing delivery care: what works for safe motherhood? Bulletin of the World Health Organization 1999; 77(5): 399. | Not specified/ general | Narrative review/ program description | Summarizes community, health system or digital health approaches with implications for policy/ practice. | Findings could be limited due data availability and context-specific factors. |
| 54 | Cancedda C, Davis SM, Dierberg KL, et al. Strengthening health systems while responding to a health crisis: lessons learned by a nongovernmental organization during the Ebola virus disease epidemic in Sierra Leone. The Journal of infectious diseases 2016; 214(suppl_3): S153-S63. | Sierra Leone | Narrative review/ program description | Summarizes community, health system or digital health approaches with implications for policy/ practice. | Findings could be limited due data availability and context-specific factors. |
| 55 | Lal P. Militants, mothers, and the national family: Ujamaa, gender, and rural development in postcolonial Tanzania. The Journal of African History 2010; 51(1): 1-20. | Tanzania | Historical/ policy/ commentary or case study | Historical or program narrative illustrating foundational community health models and their legacy. | Not primary empirical research; limited quantitative effect estimates. |
| 56 | Ngatunga AB. The Arusha community-based rehabilitation support unit: the contribution of the community in improving the living condition of people with disabilities in Arusha Region: Southern New Hampshire University; 2007. | Not specified/ general | Narrative review/ program description | Summarizes community, health system or digital health approaches with implications for policy/practice. | Findings could be limited due data availability and context-specific factors. |
| 57 | Bilal NK, Herbst CH, Zhao F, Soucat A, Lemiere C. Health extension workers in Ethiopia: improved access and coverage for the rural poor. Yes, Africa can: success stiroes from a dynamic continent 2011; 2011: 433-43. | Ethiopia | Narrative review/ program description | Summarizes community, health system or digital health approaches with implications for policy/practice. | Findings could be limited due data availability and context-specific factors. |
| 58 | Khatri RB, Endalamaw A, Erku D, et al. Enablers and barriers of community health programs for improved equity and universal coverage of primary health care services: A scoping review. BMC Primary Care 2024; 25(1): 385. | Global/ Multiple regions | Systematic/ scoping review or meta-analysis | Synthesizes evidence showing community or digital interventions impact access/quality; key enablers and barriers identified. | Findings could be limited due data availability and context-specific factors. |
| 59 | Assan A, Takian A, Aikins M, Akbarisari A. Challenges to achieving universal health coverage through community-based health planning and services delivery approach: a qualitative study in Ghana. BMJ Open 2019; 9(2): e024845. | Ghana | Qualitative interviews/ focus groups/ thematic analysis | Provides qualitative insights into implementation, acceptability and system-level enablers and barriers. | Context-specific findings from purposive samples; Findings may not be broadly applicable |
| 60 | van Niekerk L, Bautista-Gomez MM, Msiska BK, Mier-Alpaño JDB, Ongkeko AM, Manderson L. Social innovation in health: strengthening Community Systems for Universal Health Coverage in rural areas. BMC Public Health 2023; 23(1): 55. | Not specified/ general | Narrative review/ program description | Summarizes community, health system or digital health approaches with implications for policy/ practice. | Findings could be limited due data availability and context-specific factors. |
| 61 | Assefa Y, Gelaw YA, Hill PS, Taye BW, Van Damme W. Community health extension program of Ethiopia, 2003-2018: successes and challenges toward universal coverage for primary healthcare services. Global Health 2019; 15(1): 24. | Ethiopia | Narrative review/ program description | Summarizes community, health system or digital health approaches with implications for policy/ practice. | Findings could be limited due data availability and context-specific factors. |
| 62 | Long H, Zhenyu M, Duc HTT, et al. Engaging village health workers in non-communicable disease (NCD) prevention and control in Vietnam: A qualitative study. Global Public Health 2020; 15(4): 611-25. | Vietnam | Qualitative interviews/ focus groups/ thematic analysis | Provides qualitative insights into implementation, acceptability and system-level enablers and barriers. | Context-specific findings from purposive samples; Findings may not be broadly applicable |
| 63 | Banteyerga H. Ethiopia's health extension program: improving health through community involvement. MEDICC review 2011; 13: 46-9. | Ethiopia | Narrative review/ program description | Policy-oriented synthesis or perspective outlining priorities and frameworks for strengthening PHC or digital health. | Findings could be limited due data availability and context-specific factors. |
| 64 | Tadesse A. Effect of Health Extension Service on Under-Five Child Mortality and Determinants of Under-Five Child Mortality in Derra District, Oromia Regional State, Ethiopia. 2021. | Ethiopia | Narrative review/ program description | Summarizes community, health system or digital health approaches with implications for policy/ practice. | Findings could be limited due data availability and context-specific factors. |
| 65 | Agarwal S, Curtis SL, Angeles G, Speizer IS, Singh K, Thomas JC. The impact of India’s accredited social health activist (ASHA) program on the utilization of maternity services: a nationally representative longitudinal modelling study. Human resources for health 2019; 17: 1-13. | India | Narrative review/ program description | Summarizes community, health system or digital health approaches with implications for policy/ practice. | Findings could be limited due data availability and context-specific factors. |
| 66 | Victora CG, Bryce J, Fontaine O, Monasch R. Reducing deaths from diarrhoea through oral rehydration therapy. Bulletin of the world health organization 2000; 78: 1246-55. | Not specified/ general | Narrative review/ program description | Summarizes community, health system or digital health approaches with implications for policy/ practice. | Findings could be limited due data availability and context-specific factors. |
| 67 | Perry HB, Zulliger R, Rogers MM. Community Health Workers in Low-, Middle-, and High-Income Countries: An Overview of Their History, Recent Evolution, and Current Effectiveness. Annual Review of Public Health 2014; 35(Volume 35, 2014): 399-421. | Not specified/ general | Historical/ policy/ commentary or case study | Policy-oriented synthesis or perspective outlining priorities and frameworks for strengthening PHC or digital health. | Derived from secondary sources; lacks robust quantitative evidence. |
| 68 | Binagwaho A, Kyamanywa P, Farmer PE, et al. The human resources for health program in Rwanda—a new partnership. New England Journal of Medicine 2013; 369(21): 2054-9. | Rwanda | Narrative review/ program description | Summarizes community, health system or digital health approaches with implications for policy/practice. | Findings could be limited due data availability and context-specific factors. |
| 69 | Lokuge K, Wemin F, Joshy G, DL Mola G. Evaluation of an obstetric and neonatal care upskilling program for community health workers in Papua New Guinea. BMC Pregnancy and Childbirth 2024; 24(1): 357. | Papua New Guinea | Narrative review/ program description | Summarizes community, health system or digital health approaches with implications for policy/practice. | Findings could be limited due data availability and context-specific factors. |
| 70 | Turcanu G, Domente S, Buga M, Richardson E. Republic of Moldova: Health system review. Health Systems in Transition. European observatory on health systems and policies 2012; 14(7): 17. | Moldova | Narrative review/ program description | Policy-oriented synthesis or perspective outlining priorities and frameworks for strengthening PHC or digital health. | Findings could be limited due data availability and context-specific factors. |
| 71 | Vandi M, Van Griensven J, Chan A, et al. Ebola and community health worker services in Kenema District, Sierra Leone: please mind the gap! Public health action 2017; 7(1): S55-S61. | Sierra Leone | Narrative review/ program description | Summarizes community, health system or digital health approaches with implications for policy/ practice. | Findings could be limited due data availability and context-specific factors. |
| 72 | Tran BX, Hoang MT, Pham HQ, et al. The operational readiness capacities of the grassroots health system in responses to epidemics: Implications for COVID-19 control in Vietnam. J Glob Health 2020; 10(1): 011006. | Vietnam | Narrative review/ program description | Summarizes community, health system or digital health approaches with implications for policy/ practice. | Findings could be limited due data availability and context-specific factors. |
| 73 | Haines A, Sanders D, Lehmann U, et al. Achieving child survival goals: potential contribution of community health workers. Lancet 2007; 369(9579): 2121-31. | Not specified/ general | Narrative review/ program description | Summarizes community, health system or digital health approaches with implications for policy/ practice. | Findings could be limited due data availability and context-specific factors. |
| 74 | Ejigu Y, Abera N, Haileselassie W, et al. Motivation and job satisfaction of community health workers in Ethiopia: a mixed-methods approach. Human Resources for Health 2023; 21(1): 35. | Ethiopia | Mixed-methods study | Summarizes community, health system or digital health approaches with implications for policy/ practice. | Findings could be limited due data availability and context-specific factors. |
| 75 | Pandya S, Hamal M, Abuya T, et al. Understanding Factors That Support Community Health Worker Motivation, Job Satisfaction, and Performance in Three Ugandan Districts: Opportunities for Strengthening Uganda's Community Health Worker Program. Int J Health Policy Manag 2022; 11(12): 2886-94. | Uganda | Historical/ policy/ commentary or case study | Policy-oriented synthesis or perspective outlining priorities and frameworks for strengthening PHC or digital health. | Derived from secondary sources; lacks robust quantitative evidence. |
| 76 | Mundeva H, Snyder J, Ngilangwa DP, Kaida A. Ethics of task shifting in the health workforce: exploring the role of community health workers in HIV service delivery in low- and middle-income countries. BMC Med Ethics, 2018. http://europepmc.org/abstract/MED/29973217(accessed 2018/07//). | Not specified/ general | Narrative review/ program description | Summarizes community, health system or digital health approaches with implications for policy/ practice. | Findings could be limited due data availability and context-specific factors. |
| 77 | Barr A, Garrett L, Marten R, Kadandale S. Health sector fragmentation: three examples from Sierra Leone. Globalization and Health 2019; 15(1): 8. | Sierra Leone | Narrative review/ program description | Summarizes community, health system or digital health approaches with implications for policy/ practice. | Findings could be limited due data availability and context-specific factors. |
| 78 | Rajabi M, Ebrahimi P, Aryankhesal A. Collaboration between the government and nongovernmental organizations in providing health-care services: A systematic review of challenges. J Educ Health Promot 2021; 10: 242. | Global/ Multiple regions | Systematic/ scoping review or meta-analysis | Synthesizes evidence showing community or digital interventions impact access/quality; key enablers and barriers identified. | Limited by heterogeneity of included studies and potential publication bias. |
| 79 | Assembly WH. Community health workers delivering primary health care: opportunities and challenges. World Health Organization 2019. | Not specified/ general | Narrative review/ program description | Summarizes community, health system or digital health approaches with implications for policy/ practice. | Findings could be limited due data availability and context-specific factors. |
| 80 | Afzal MM, Pariyo GW, Lassi ZS, Perry HB. Community health workers at the dawn of a new era: 2. Planning, coordination, and partnerships. Health Research Policy and Systems 2021; 19: 1-17. | Not specified/ general | Historical/ policy/ commentary or case study | Policy-oriented synthesis or perspective outlining priorities and frameworks for strengthening PHC or digital health. | Not primary empirical research; limited quantitative effect estimates. |
| 81 | Musoke D, Atusingwize E, Ndejjo R, Ssemugabo C, Siebert P, Gibson L. Enhancing performance and sustainability of community health worker programs in Uganda: lessons and experiences from stakeholders. Global Health: Science and Practice 2021; 9(4): 855-68. | Uganda | Narrative review/ program description | Summarizes community, health system or digital health approaches with implications for policy/practice. | Findings could be limited due data availability and context-specific factors. |
| 82 | Krah E, de Kruijf J, Ragno L. Integrating Traditional Healers into the Health Care System: Challenges and Opportunities in Rural Northern Ghana. J Community Health 2018; 43(1): 157-63. | Ghana | Narrative review/ program description | Summarizes community, health system or digital health approaches with implications for policy/ practice. | Findings could be limited due data availability and context-specific factors. |
| 83 | Sieverding M, Beyeler N. Integrating informal providers into a people-centered health systems approach: qualitative evidence from local health systems in rural Nigeria. BMC Health Serv Res 2016; 16(1): 526. | Nigeria | Qualitative interviews/ focus groups/ thematic analysis | Provides qualitative insights into implementation, acceptability and system-level enablers and barriers. | Context-specific findings from purposive samples; Findings may not be broadly applicable |
| 84 | Musoke D, Ndejjo R, Atusingwize E, Mukama T, Ssemugabo C, Gibson L. Performance of community health workers and associated factors in a rural community in Wakiso district, Uganda. African Health Sciences 2019; 19(3): 2784-97. | Uganda | Narrative review/ program description | Summarizes community, health system or digital health approaches with implications for policy/ practice. | Findings could be limited due data availability and context-specific factors. |
| 85 | Barimah KB. Traditional healers as service providers in Ghana's National Health Insurance Scheme: the wrong way forward? Glob Public Health 2013; 8(2): 202-8. | Ghana | Narrative review/ program description | Summarizes community, health system or digital health approaches with implications for policy/ practice. | Findings could be limited due data availability and context-specific factors. |
| 86 | Organization WH. HIV causing Tuberculosis cases to Double in Africa https://www.who.int/news/item/23-04-2001-hiv-causing-tuberculosis-cases-to-double-in-africa accessed 15 May 2025. 2001. | Global/ Multiple regions | Narrative review/ program description | Policy-oriented synthesis or perspective outlining priorities and frameworks for strengthening PHC or digital health. | Findings could be limited due data availability and context-specific factors. |
| 87 | Chaisson RE, Martinson NA. Tuberculosis in Africa — Combating an HIV-Driven Crisis. New England Journal of Medicine 2008; 358(11): 1089-92. | Not specified / general | Narrative review/ program description | Summarizes community, health system or digital health approaches with implications for policy/ practice. | Findings could be limited due data availability and context-specific factors. |
| 88 | Li C, Islam N, Gutierrez JP, et al. Associations of diabetes, hypertension and obesity with COVID-19 mortality: a systematic review and meta-analysis. BMJ Glob Health 2023; 8(12). | Global/ Multiple regions | Systematic/ scoping review or meta-analysis | Synthesizes evidence showing community or digital interventions impact access/quality; key enablers and barriers identified. | Limited by heterogeneity of included studies and potential publication bias. |
| 89 | Organization WH. COVID-19 significantly impacts health services for noncommunicable diseases; https://www.who.int/news/item/01-06-2020-covid-19-significantly-impacts-health-services-for-noncommunicable-diseases accessed on 15 May 2025. 2020. | Global/ Multiple regions | Narrative review/ program description | Policy-oriented synthesis or perspective outlining priorities and frameworks for strengthening PHC or digital health. | Findings could be limited due data availability and context-specific factors. |
| 90 | Nachega JB, Kapata N, Sam-Agudu NA, et al. Minimizing the impact of the triple burden of COVID-19, tuberculosis and HIV on health services in sub-Saharan Africa. Int J Infect Dis 2021; 113 Suppl 1: S16-s21. | Not specified/ general | Narrative review/ program description | Summarizes community, health system or digital health approaches with implications for policy/ practice. | Findings could be limited due data availability and context-specific factors. |
| 91 | Akselrod S, Collins TE, Hoe C, et al. Building an interdisciplinary workforce for prevention and control of non-communicable diseases: the role of e-learning. bmj 2023; 381. | Not specified/ general | Narrative review/ program description | Summarizes community, health system or digital health approaches with implications for policy/ practice. | Findings could be limited due data availability and context-specific factors. |
| 92 | Hambleton IR, Caixeta R, Jeyaseelan SM, Luciani S, Hennis AJM. The rising burden of non-communicable diseases in the Americas and the impact of population aging: a secondary analysis of available data. Lancet Reg Health Am 2023; 21: 100483. | Americas | Narrative review/ program description | Summarizes community, health system or digital health approaches with implications for policy/ practice. | Findings could be limited due data availability and context-specific factors. |
| 93 | Bygbjerg IC. Double Burden of Noncommunicable and Infectious Diseases in Developing Countries. Science 2012; 337(6101): 1499-501. | Not specified/ general | Narrative review/ program description | Summarizes community, health system or digital health approaches with implications for policy/ practice. | Findings could be limited due data availability and context-specific factors. |
| 94 | Weber H. Age structure and political violence: a re-assessment of the “youth bulge” hypothesis. International Interactions 2019; 45(1): 80-112. | Global/ Multiple regions | Narrative review/ program description | Summarizes community, health system or digital health approaches with implications for policy/ practice. | Findings could be limited due data availability and context-specific factors. |
| 95 | Jimenez EYaM, Murgai. Investing in the Youth Bulge. Finance & Development 2006; 43(3). | Not specified/ general | Narrative review / program description | Summarizes community, health system or digital health approaches with implications for policy/ practice. | Findings could be limited due data availability and context-specific factors. |
| 96 | Morris JL, Rushwan H. Adolescent sexual and reproductive health: The global challenges. International Journal of Gynecology & Obstetrics 2015; 131(S1): S40-S2. | Global | Narrative review/ program description | Summarizes community, health system or digital health approaches with implications for policy/ practice. | Findings could be limited due data availability and context-specific factors. |
| 97 | Kamanzi N, University Ii KI. The Impact of Urbanization on Public Health. 2024; 5: 13-6. | Not specified / general | Narrative review/ program description | Summarizes community, health system or digital health approaches with implications for policy/ practice. | Findings could be limited due data availability and context-specific factors. |
| 98 | Cacciatore S, Mao S, Nuñez MV, et al. Urban health inequities and healthy longevity: traditional and emerging risk factors across the cities and policy implications. Aging Clinical and Experimental Research 2025; 37(1): 143. | Not specified/ general | Historical/ policy/ commentary or case study | Policy-oriented synthesis or perspective outlining priorities and frameworks for strengthening PHC or digital health. | Not primary empirical research; limited quantitative effect estimates. |
| 99 | Park JE, Kibe P, Yeboah G, et al. Factors associated with accessing and utilisation of healthcare and provision of health services for residents of slums in low and middle-income countries: a scoping review of recent literature. BMJ Open 2022; 12(5): e055415. | Global/ Multiple regions | Systematic/ scoping review or meta-analysis | Synthesizes evidence showing community or digital interventions impact access/quality; key enablers and barriers identified. | Findings could be limited due data availability and context-specific factors. |
| 100 | Shafique S, Bhattacharyya DS, Nowrin I, et al. Effective community-based interventions to prevent and control infectious diseases in urban informal settlements in low- and middle-income countries: a systematic review. Syst Rev 2024; 13(1): 253. | Global/ Multiple regions | Systematic/ scoping review or meta-analysis | Synthesizes evidence showing community or digital interventions impact access/ quality; key enablers and barriers identified. | Limited by heterogeneity of included studies and potential publication bias. |
| 101 | Babu BV, Kusuma YS, Sivakami M, et al. Inclusive partnership and community mobilization approaches to improve maternal health care access among internal migrants in nine Indian cities. J Migr Health 2022; 6: 100130. | India | Narrative review/ program description | Summarizes community, health system or digital health approaches with implications for policy/ practice. | Findings could be limited due data availability and context-specific factors. |
| 102 | Junaedi J, Dikrurohman D, Abdullah A. Analysis of Social Change in Rural Communities Due to the Influence of Urbanization and Globalization in Indonesia. Edunity: Kajian Ilmu Sosial dan Pendidikan 2023; 2: 431-41. | Global | Narrative review/ program description | Summarizes community, health system or digital health approaches with implications for policy/ practice. | Findings could be limited due data availability and context-specific factors. |
| 103 | Friedemann ML, Buckwalter KC. Family Caregiver Role and Burden Related to Gender and Family Relationships. J Fam Nurs 2014; 20(3): 313-36. | Not specified/ general | Narrative review/ program description | Summarizes community, health system or digital health approaches with implications for policy/ practice. | Findings could be limited due data availability and context-specific factors. |
| 104 | Brady B, Rosenberg S, Newman C, et al. Gender is dynamic for all people. Discover Psychology 2022; 2(1): 41. | Not specified/ general | Narrative review/ program description | Summarizes community, health system or digital health approaches with implications for policy/practice. | Findings could be limited due data availability and context-specific factors. |
| 105 | Zhao C, Wang F, Zhou X, Jiang M, Hesketh T. Impact of parental migration on psychosocial well-being of children left behind: a qualitative study in rural China. International Journal for Equity in Health 2018; 17(1): 80. | China | Qualitative interviews/ focus groups/thematic analysis | Provides qualitative insights into implementation, acceptability and system-level enablers and barriers. | Context-specific findings from purposive samples; Findings may not be broadly applicable |
| 106 | Song Q. Aging and separation from children: The health implications of adult migration for elderly parents in rural China. Demogr Res 2017; 37: 1761-92. | China | Narrative review/ program description | Summarizes community, health system or digital health approaches with implications for policy/practice. | Findings could be limited due data availability and context-specific factors. |
| 107 | Gushulak BD, J. W, and MacPherson DW. Migrants and emerging public health issues in a globalized world: threats, risks and challenges, an evidence-based framework. Emerging Health Threats Journal 2009; 2(1): 7091. | Global | Narrative review/ program description | Summarizes community, health system or digital health approaches with implications for policy/ practice. | Findings could be limited due data availability and context-specific factors. |
| 108 | Rai DK. Changes of Family Structure in Nepal. DMC Journal 2023; 8(7): 73-9. | Nepal | Narrative review/ program description | Summarizes community, health system or digital health approaches with implications for policy/ practice. | Findings could be limited due data availability and context-specific factors. |
| 109 | Puschmann P, Solli A. Household and family during urbanization and industrialization: Efforts to shed new light on an old debate. Taylor & Francis; 2014. p. 1-12. | Not specified/ general | Randomized/ cluster randomized trial, Cross-sectional survey/secondary data analysis | Evaluates an intervention showing improved programmatic or clinical outcomes with contextual caveats. | May have limited external validity and implementation fidelity issues. |
| 110 | Gopalakrishan K. Changing scenario of family system in India: An analysis against the backdrop of changing social values. 2021. | India | Narrative review/ program description | Summarizes community, health system or digital health approaches with implications for policy/practice. | Findings could be limited due data availability and context-specific factors. |
| 111 | Moen P, Robison J, Fields V. Women's work and caregiving roles: a life course approach. J Gerontol 1994; 49(4): S176-86. | Not specified/ general | Narrative review/ program description | Summarizes community, health system or digital health approaches with implications for policy/practice. | Findings could be limited due data availability and context-specific factors. |
| 112 | Dahal P, Joshi SK, Swahnberg K. A qualitative study on gender inequality and gender-based violence in Nepal. BMC Public Health 2022; 22(1): 2005. | Nepal | Qualitative interviews/ focus groups/thematic analysis | Provides qualitative insights into implementation, acceptability and system-level enablers and barriers. | Context-specific findings from purposive samples; Findings may not be broadly applicable |
| 113 | Abbasgholizadeh Rahimi S, Légaré F, Sharma G, et al. Application of artificial intelligence in community-based primary health care: systematic scoping review and critical appraisal. Journal of Medical Internet Research 2021; 23(9): e29839. | Global/ Multiple regions | Systematic/ scoping review or meta-analysis | Synthesizes evidence showing community or digital interventions impact access/quality; key enablers and barriers identified. | Findings could be limited due data availability and context-specific factors. |
| 114 | Melchior C, Oliveira M. Health-related fake news on social media platforms: A systematic literature review. New Media & Society 2022; 24(6): 1500-22. | Not specified/ general | Narrative review/ program description | Policy-oriented synthesis or perspective outlining priorities and frameworks for strengthening PHC or digital health. | Findings could be limited due data availability and context-specific factors. |
| 115 | Li C, Borycki EM, Kushniruk AW. Connecting the world of healthcare virtually: a scoping review on virtual care delivery. Healthcare; 2021: MDPI; 2021. p. 1325. | Global/ Multiple regions | Systematic/ scoping review or meta-analysis | Synthesizes evidence showing community or digital interventions impact access/quality; key enablers and barriers identified. | Findings could be limited due data availability and context-specific factors. |
| 116 | Vargo D, Zhu L, Benwell B, Yan Z. Digital technology use during COVID-19 pandemic: A rapid review. Human Behavior and Emerging Technologies 2021; 3(1): 13-24. | Global/ Multiple regions | Narrative review/ program description | Policy-oriented synthesis or perspective outlining priorities and frameworks for strengthening PHC or digital health. | Findings could be limited due data availability and context-specific factors. |
| 117 | Niels P, Mark S, Philip S. Digital health and care in pandemic times: impact of COVID-19. BMJ Health & Care Informatics 2020; 27(1): e100166. | Global/ Multiple regions | Narrative review/ program description | Summarizes community, health system or digital health approaches with implications for policy/practice. | Findings could be limited due data availability and context-specific factors. |
| 118 | Jat AS, Grønli T-M. Harnessing the digital revolution: a comprehensive review of mHealth applications for remote monitoring in transforming healthcare delivery. International Conference on Mobile Web and Intelligent Information Systems; 2023: Springer; 2023. p. 55-67. | Global/ Multiple regions | Narrative review/ program description | Policy-oriented synthesis or perspective outlining priorities and frameworks for strengthening PHC or digital health. | Findings could be limited due data availability and context-specific factors. |
| 119 | Blocker A, Datay MI, Mwangama J, Malila B. Development of a telemedicine virtual clinic system for remote, rural, and underserved areas using user-centered design methods. DIGITAL HEALTH 2024; 10: 20552076241256752. | Not specified/ general | Narrative review/ program description | Summarizes community, health system or digital health approaches with implications for policy/ practice. | Findings could be limited due data availability and context-specific factors. |
| 120 | Sriharan A, Kuhlmann E, Correia T, et al. Artificial Intelligence in Healthcare: Balancing Technological Innovation with Health and Care Workforce Priorities. The International Journal of Health Planning and Management 2025. | Global/ Multiple regions | Narrative review/ program description | Summarizes community, health system or digital health approaches with implications for policy/ practice. | Findings could be limited due data availability and context-specific factors. |
| 121 | Kumar Y, Gupta S, Singla R, Hu YC. A Systematic Review of Artificial Intelligence Techniques in Cancer Prediction and Diagnosis. Arch Comput Methods Eng 2022; 29(4): 2043-70. | Global/Multiple regions | Systematic/ scoping review or meta-analysis | Synthesizes evidence showing community or digital interventions impact access/quality; key enablers and barriers identified. | Limited by heterogeneity of included studies and potential publication bias. |
| 122 | Wu M, Du X, Gu R, Wei J. Artificial intelligence for clinical decision support in sepsis. Frontiers in Medicine 2021; 8: 665464. | Not specified/ general | Narrative review/ program description | Summarizes community, health system or digital health approaches with implications for policy/ practice. | Findings could be limited due data availability and context-specific factors. |
| 123 | Guidance W. Ethics and governance of artificial intelligence for health. World Health Organization 2021. | Not specified/ general | Narrative review/ program description | Summarizes community, health system or digital health approaches with implications for policy/ practice. | Findings could be limited due data availability and context-specific factors. |
| 124 | Emma L. The Ethical Implications of Artificial Intelligence: A Deep Dive into Bias, Fairness, and Transparency. 2024. | Not specified / general | Narrative review / program description | Summarizes community, health system or digital health approaches with implications for policy/practice. | Findings could be limited due data availability and context-specific factors. |
| 125 | d'Elia A, Gabbay M, Rodgers S, et al. Artificial intelligence and health inequities in primary care: a systematic scoping review and framework. Family Medicine and Community Health 2022; 10(Suppl 1): e001670. | Global/ Multiple regions | Systematic/ scoping review or meta-analysis | Synthesizes evidence showing community or digital interventions impact access/ quality; key enablers and barriers identified. | Findings could be limited due data availability and context-specific factors. |
| 126 | AlHasan A. Bias in medical artificial intelligence. The Bulletin of the Royal College of Surgeons of England 2021; 103(6): 302-5. | Not specified/ general | Narrative review/ program description | Summarizes community, health system or digital health approaches with implications for policy/practice. | Findings could be limited due data availability and context-specific factors. |
| 127 | Larasati R. Inclusivity of AI Speech in Healthcare: A Decade Look Back. arXiv preprint arXiv:250510596 2025. | Not specified/ general | Narrative review/ program description | Summarizes community, health system or digital health approaches with implications for policy/practice. | Findings could be limited due data availability and context-specific factors. |
| 128 | Klingbeil A, Grützner C, Schreck P. Trust and reliance on AI—An experimental study on the extent and costs of overreliance on AI. Computers in Human Behavior 2024; 160: 108352. | Not specified/ general | Narrative review/ program description | Summarizes community, health system or digital health approaches with implications for policy/ practice. | Findings could be limited due data availability and context-specific factors. |
| 129 | Tierney AA, Reed ME, Grant RW, Doo FX, Payán DD, Liu VX. Health Equity in the Era of Large Language? Models. American Journal of Managed Care 2025; 31(3). | Americas | Narrative review/ program description | Summarizes community, health system or digital health approaches with implications for policy/ practice. | Findings could be limited due data availability and context-specific factors. |
| 130 | Mondal H, Mondal S. Chapter Thirteen - Ethical and social issues related to AI in healthcare. In: Srivastava A, Mishra V, eds. Methods in Microbiology: Academic Press; 2024: 247-81. | Not specified/ general | Narrative review/ program description | Summarizes community, health system or digital health approaches with implications for policy/practice. | Findings could be limited due data availability and context-specific factors. |
| 131 | Carey S, Pang A, Kamps Md. Fairness in AI for healthcare. Future Healthcare Journal 2024; 11(3): 100177. | Not specified/ general | Narrative review/ program description | Summarizes community, health system or digital health approaches with implications for policy/practice. | Findings could be limited due data availability and context-specific factors. |
| 132 | Campos-Castillo C, Anthony D. Racial and ethnic differences in self-reported telehealth use during the COVID-19 pandemic: a secondary analysis of a US survey of internet users from late March. Journal of the American Medical Informatics Association 2020; 28(1): 119-25. | Americas | Cross-sectional survey/ secondary data analysis | Policy-oriented synthesis or perspective outlining priorities and frameworks for strengthening PHC or digital health. | Cross-sectional design limits causal inference; potential reporting bias. |
| 133 | Choi NG, DiNitto DM. The digital divide among low-income homebound older adults: Internet use patterns, eHealth literacy, and attitudes toward computer/Internet use. Journal of medical Internet research 2013; 15(5): e93. | Not specified/ general | Narrative review/ program description | Summarizes community, health system or digital health approaches with implications for policy/ practice. | Findings could be limited due data availability and context-specific factors. |
| 134 | Kozelka EE, Jenkins JH, Carpenter-Song E. Advancing Health Equity in Digital Mental Health: Lessons from Medical Anthropology for Global Mental Health. JMIR mental health, 2021. http://europepmc.org/abstract/MED/34398788 (accessed 2021/08//). | Europe | Narrative review/ program description | Summarizes community, health system or digital health approaches with implications for policy/ practice. | Findings could be limited due data availability and context-specific factors. |
